# Supplementary material for: High performance hybrid capacitive deionization with a Ag-coated activated carbon electrode
Source: Royal Society of Chemistry journal article supplement (doi:10.1039/d1ew00209k), 2021-01-01
Supplement: d1ew00209k1.pdf [file d1ew00209k1.pdf]

## High Performance Hybrid Capacitive Deionization with Ag-coated Activated Carbon Electrode

Hongsik Yoon<sup>\*,1</sup>, Jiho Lee <sup>2</sup>, Taijin Min <sup>1</sup>, Gunhee Lee <sup>1</sup>, Minsub Oh <sup>3</sup>

<sup>1</sup> Department of Environmental Machinery, Korea Institute of Machinery & Materials, Daejeon 34103, Republic of Korea

<sup>2</sup> Water Cycle Research Center, Korea Institute of Science and Technology, Seoul 02792, Republic of Korea

<sup>3</sup> Department of Nano-Mechanics, Korea Institute of Machinery & Materials, Daejeon 34103, Republic of Korea

\* Corresponding author: Hongsik Yoon, Email: yoonhs@kimm.re.kr, Phone: +82-42-868-7891

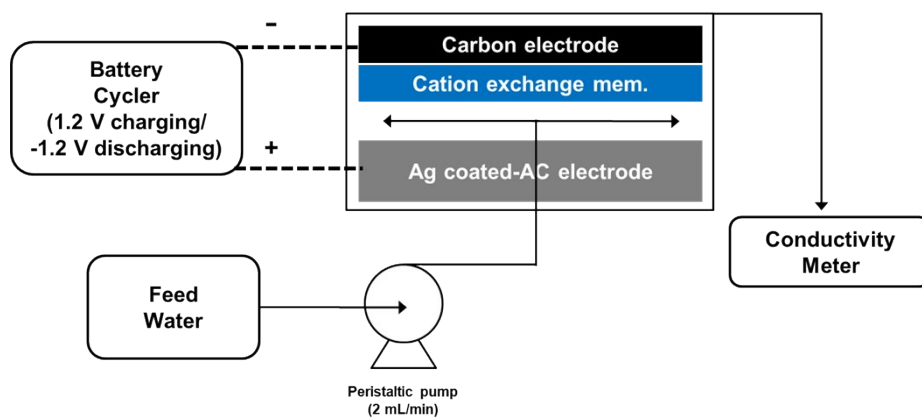

**Fig S1.** Schematic of deionization cell.

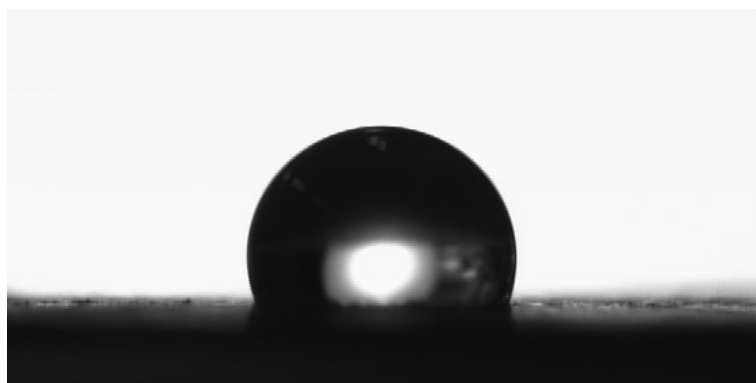

(a)

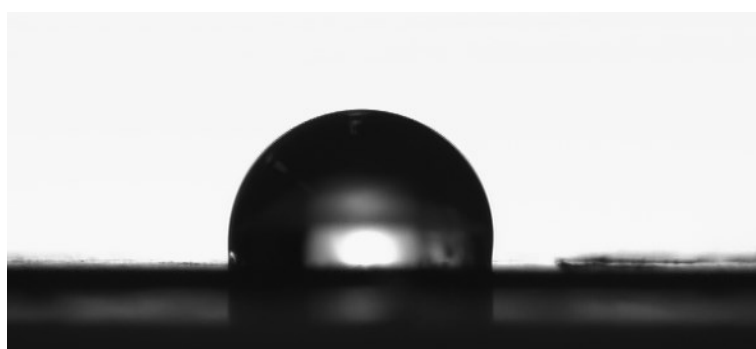

(b)

**Fig. S2** Contact angle images of (a) pristine activated carbon (AC) electrode ( $110^\circ$ ) and (b) Ag-coated AC electrode ( $95^\circ$ ).

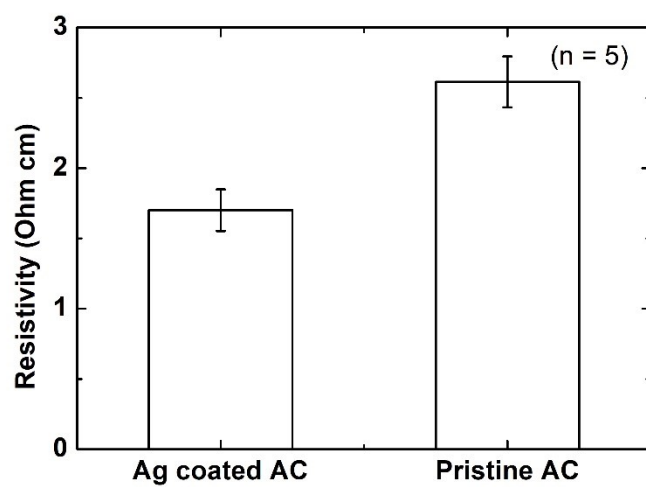

**Fig. S3** Electrode resistivity of the HCDI with Ag coated AC and pristine AC.

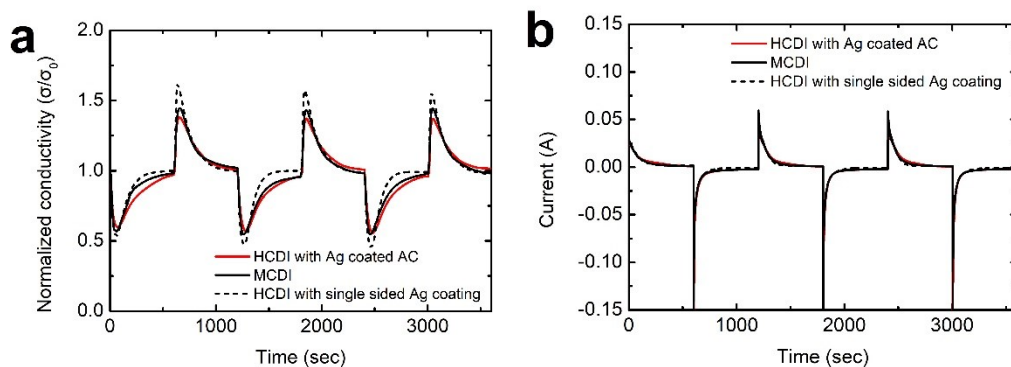

**Fig. S4** (a) Normalized conductivity with time of the effluent (the initial conductivity was  $1.15 \pm 0.05$  mS/cm). (b) Current profiles of the three different system configuration (i.e., HCDCI with Ag coated AC, MCDI, and HCDCI with single sided Ag coating). (Feed: 10 mM NaCl, Applied electrical potential: 1.2 V at adsorption / -1.2 V at desorption, Flow rate: 2 mL/min).

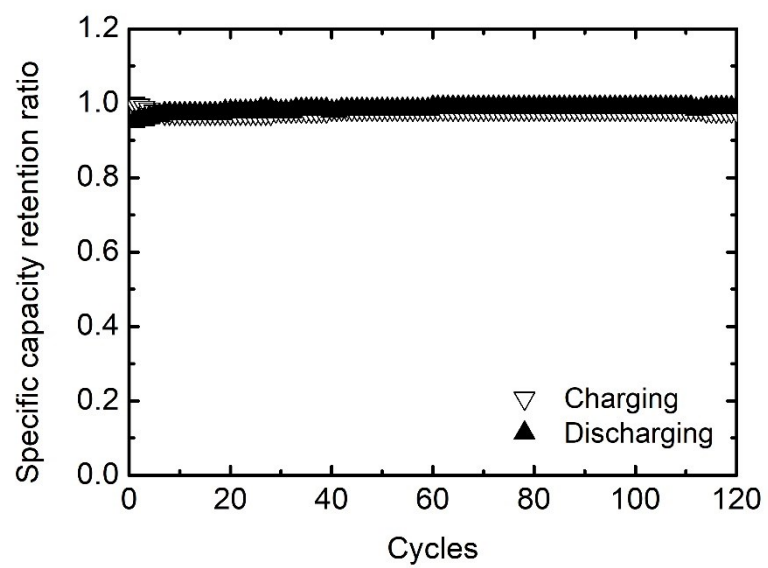

**Fig. S5** Capacity retention of the HCDI with Ag coated AC with respect to the cycle number (electrolyte: 2 M NaCl, potential range: -0.1 ~ 1.2 V, current density: 10 mA/cm<sup>2</sup>).

**Table S1.** The deionization performance expressed as salt adsorption capacity (SAC) (i.e., deionization capacity) and charge efficiency of the HCDI with Ag provided in the previous researches

| Electrode                                      | Salt adsorption capacity (mg/g) | Charge efficiency (%) | Feed water (mg NaCl/L) | Applied voltage (V) | Ref       |
|------------------------------------------------|---------------------------------|-----------------------|------------------------|---------------------|-----------|
| Ag coated activated carbon (AC)                | 23.3                            | 75                    | 584.4                  | 1.2                 | This work |
|                                                | 14.0                            | 98                    |                        | 0.7                 |           |
| Single sided Ag coating on AC electrode        | 15.6                            | 92                    | 584.4                  | 0.7                 | 1         |
| MnO <sub>2</sub> /AC // Ag/AC                  | 17.8                            | 83                    | 1168.8                 | 1.2                 | 2         |
| Ag-Cu-graphene                                 | 16.8                            | 90                    | 600                    | 1.2                 | 3         |
| CNTs-Si-Ag                                     | 17.5 (@ 3rd cycle)              | 20 (current eff.)     | not provided           | 1.0                 | 4         |
| Ag-doped sepiolite intercalated graphene       | 20.7                            | 87                    | 600                    | 1.2                 | 5         |
| Ag-doped hollow ZIFs-derived nanoporous carbon | 29.2                            | 60                    | 500                    | 1.2                 | 6         |

Table S1 shows the salt adsorption capacity (i.e., deionization capacity) and charge efficiency of the HCDI with Ag-coated AC in comparison with the results in the previous researches. As shown in Table R1, this research work showed good SAC and charge efficiency compared to the results in the previous researches. First, in terms of SAC, among the studies using commercially available electrode substrate materials (activated carbon (AC), CNT, graphene), this work showed the best SAC (23.3 mg/g). One study that reported better SAC than this work is a case with hollow ZIFs-derived nanoporous carbon.<sup>6</sup> However, since hollow ZIFs-derived nanoporous carbon is not a commercially available electrode substrate material, it is considered that it may be limited in terms of commercial application. Second, in terms of charge efficiency, a study that reported a charge efficiency superior to this study was introduced, but in the case of 0.7 V operation, the charge efficiency introduced in this study was the best (98%).

## Reference

- 1 H. Yoon, J. Lee, S. Kim, J. Yoon, Hybrid capacitive deionization with Ag coated carbon composite electrode. *Desalination*, **2017**, 422, 42-48.
- 2 M. Li, H. G. Park, Pseudocapacitive coating for effective capacitive deionization. *ACS applied materials & interfaces*, **2018**, 10, 2442-2450.
- 3 M. R. Vengatesan, I. F. F. Darawsheh, B. Govindan, E. Alhseinat, F. Banat, Ag-Cu bimetallic nanoparticle decorated graphene nanocomposite as an effective anode material for hybrid capacitive deionization (HCDI) system. *Electrochimica Acta*, **2019**, 297, 1052-1062.
- 4 N. Arora, F. Banat, E. Alhseinat, Capacitive deionization performance of CNTs-Si-Ag based electrodes for the removal of heat stable salts from methyldiethanolamine (MDEA) solution in natural gas sweetening units. *Chemical Engineering Journal*, **2019**, 356, 400-412.
- 5 M. R. Vengatesan, E. Alhseinat, A. F. Arangadi, S. Anwer, Y. Y. Kannangara, J. K. Song, F. Banat, Ag-doped sepiolite intercalated graphene nanostructure for hybrid capacitive deionization system. *Separation and Purification Technology*, **2019**, 229, 115799.
- 6 H. Zhang, W. Zhang, J. Shen, Y. Li, X. Yan, J. Qi, X. Sun, J. Shen, W. Han, L. Wang, J. Li, Ag-doped hollow ZIFs-derived nanoporous carbon for efficient hybrid capacitive deionization. *Desalination*, **2020**, 473, 114173.
